# Supplementary material
Source: publisher figshare collection journal article supplement (https://acs.figshare.com/ndownloader/files/4028248)
Supplement: Supplementary file 1 [file 4028248]

# Supporting information

**Table S1** Amino group content and net charge of BLG and CBLG\*

| Sample name | EDA mol/L | TBNS reactive –NH <sub>2</sub> per molecule** | Total –NH <sub>2</sub> per molecule** | Total –COOH per molecule** | Net charge per molecule |
|-------------|-----------|-----------------------------------------------|---------------------------------------|----------------------------|-------------------------|
| BLG         | 0         | 16.3±0.2 <sup>d</sup>                         | 19.3                                  | 25.7                       | -7                      |
| C-0.6M      | 0.6       | 21.4±0.4 <sup>c</sup>                         | 24.4                                  | 20.6                       | +3                      |
| C-0.9M      | 0.9       | 24.4±0.3 <sup>b</sup>                         | 27.4                                  | 17.6                       | +9                      |
| C-1.2M      | 1.2       | 26.6±0.2 <sup>a</sup>                         | 31.6                                  | 13.4                       | +17                     |
| C-1.5M      | 1.5       | 27.3±0.5 <sup>a</sup>                         | 31.3                                  | 13.7                       | +17                     |

\* Data with different letters showed significant difference (n=3, P<0.05).

\*\* Reactive amino groups included the ones in the lysine residues and those introduced by cationization. Total amino groups were reactive amino groups plus the ones in the arginine residues. Total carboxyl groups represented the ones in the aspartic acid and glutamic acid residue. This number was deducted by one upon the addition of each amino group. The net charge (rounded up) was calculated by summing up the electric charges of all residues on BLG or CBLG.

**Table S2** Zeta potential and hydrophobicity of BLG and CBLG in PBS and HBSS \*

| Sample | In PBS                 |                                | In HBSS                |                                |
|--------|------------------------|--------------------------------|------------------------|--------------------------------|
|        | Zeta potential (mV)    | Hydrophobicity (dimensionless) | Zeta potential (mV)    | Hydrophobicity (dimensionless) |
| BLG    | -37.0±0.1 <sup>e</sup> | 108.5±9.6 <sup>e</sup>         | -18.3±0.2 <sup>d</sup> | 68.0±7.2 <sup>e</sup>          |
| C-0.6M | 18.1±0.3 <sup>d</sup>  | 740.1±10.2 <sup>d</sup>        | 6.7±0.1 <sup>c</sup>   | 305.8±11.4 <sup>d</sup>        |
| C-0.9M | 27.2±0.5 <sup>c</sup>  | 850.2±11.4 <sup>c</sup>        | 11.4±0.2 <sup>b</sup>  | 421.5±15.4 <sup>c</sup>        |
| C-1.2M | 36.8±0.4 <sup>b</sup>  | 1022.3±17.6 <sup>b</sup>       | 16.1±0.3 <sup>ab</sup> | 571.0±14.2 <sup>b</sup>        |
| C-1.5M | 38.9±0.4 <sup>a</sup>  | 1269.8±15.4 <sup>a</sup>       | 17.5±0.3 <sup>a</sup>  | 628.9±16.3 <sup>a</sup>        |

\* Data with different letters showed significant difference (n=3, P<0.05).

**Table S3** Assignment and relative band areas of infrared Fourier self-deconvolved BLG and

CBLG \*

| Band assignment | Native BLG                     |       | C-1.5M                         |       |
|-----------------|--------------------------------|-------|--------------------------------|-------|
|                 | Wavenumber (cm <sup>-1</sup> ) | Area% | Wavenumber (cm <sup>-1</sup> ) | Area% |
| Side chain      | 1610                           | **    | 1604                           | **    |

|                   |      |       |      |       |
|-------------------|------|-------|------|-------|
| β-sheet           | 1620 | 14.15 | 1614 | 6.28  |
| β-sheet           | 1630 | 20.71 | 1624 | 15.39 |
| β-sheet           | 1638 | 12.72 | 1634 | 15.53 |
| Random coil       | 1648 | 12.54 | 1642 | 17.14 |
| α-helix           | 1656 | 9.96  | 1651 | 13.33 |
| Turns             | 1666 | 10.26 | 1660 | 12.82 |
| Turns             | 1676 | 7.59  | 1671 | 11.48 |
| Turns             | 1685 | 6.94  | 1681 | 9.58  |
| β-sheet           | 1695 | 5.13  | 1693 | 6.78  |
| Total α-helix     |      | 9.36  |      | 13.06 |
| Total β-sheet     |      | 52.12 |      | 36.94 |
| Total random coil |      | 25.80 |      | 33.20 |
| Total turns       |      | 12.72 |      | 16.80 |

\* The sample C-1.5M was employed for the FSD process.

\*\* The IR intensity due to side chain vibration was excluded in the calculation for secondary structures.

**Table S4** Mucoadhesion properties of BLG and CBLGs \*

| Sample | PSM adsorption<br>ng/cm <sup>2</sup> | Protein adsorption<br>ng/cm <sup>2</sup> | Mass ratio<br>(Pro: PSM) |
|--------|--------------------------------------|------------------------------------------|--------------------------|
| BLG    | 238±12 <sup>c</sup>                  | 85±14 <sup>c</sup>                       | 0.357±0.052 <sup>e</sup> |
| C-0.6M | 359±17 <sup>a</sup>                  | 231±15 <sup>b</sup>                      | 0.643±0.013 <sup>d</sup> |
| C-0.9M | 378±15 <sup>a</sup>                  | 308±20 <sup>ab</sup>                     | 0.815±0.020 <sup>c</sup> |
| C-1.2M | 243±12 <sup>c</sup>                  | 240±15 <sup>b</sup>                      | 0.988±0.044 <sup>b</sup> |
| C-1.5M | 294±10 <sup>b</sup>                  | 370±14 <sup>a</sup>                      | 1.259±0.071 <sup>a</sup> |

\* Data with different letters showed significant difference (n=3, P<0.05).

**Table S5** Characters of BLG and CBLG nanoparticles\*

| Sample   | Acetone<br>% | Particle size<br>nm     | Count rate<br>kcps       | Polydispersity<br>index  |
|----------|--------------|-------------------------|--------------------------|--------------------------|
| BLG      | 80           | 139.1±5.7 <sup>b</sup>  | 47.4±5.2 <sup>d</sup>    | 0.255±0.003 <sup>b</sup> |
| BLG      | 90           | 136.3±11.2 <sup>b</sup> | 386.2±7.8 <sup>a</sup>   | 0.142±0.002 <sup>d</sup> |
| C-0.6M   | 80           | 172.3±6.2 <sup>a</sup>  | 402.4±7.1 <sup>a</sup>   | 0.086±0.002 <sup>e</sup> |
| C-0.6M** | 90           | -                       | -                        | -                        |
| C-0.9M   | 80           | 170.4±10.7 <sup>a</sup> | 30.8±2.3 <sup>e</sup>    | 0.293±0.004 <sup>a</sup> |
| C-0.9M   | 90           | 93.5±3.4 <sup>c</sup>   | 314.6±10.2 <sup>bc</sup> | 0.095±0.004 <sup>c</sup> |
| C-1.2M   | 80           | 165.0±5.2 <sup>a</sup>  | 26.1±1.4 <sup>f</sup>    | 0.255±0.006 <sup>b</sup> |

|        |    |                         |                         |                          |
|--------|----|-------------------------|-------------------------|--------------------------|
| C-1.2M | 90 | 75.4±6.7 <sup>c</sup>   | 259.4±12.5 <sup>c</sup> | 0.104±0.003 <sup>c</sup> |
| C-1.5M | 80 | 155.7±10.1 <sup>a</sup> | 15.8±1.6 <sup>g</sup>   | 0.297±0.005 <sup>a</sup> |
| C-1.5M | 90 | 81.5±4.2 <sup>c</sup>   | 280.4±13.1 <sup>c</sup> | 0.124±0.002 <sup>c</sup> |

22 \* Data with different letters showed significant difference (n=3, P<0.05). A fixed protein concentration of  
23 2 mg/mL was adopted.

24 \*\* No data available due to protein precipitation.

25
